# Supplementary material for: At least it is a dry cold: the global distribution of freeze–thaw and drought stress and the traits that may impart poly-tolerance in conifers
Source: PubMed Central journal article supplement (PMC9833871; doi:10.1093/treephys/tpac102), 2022-09-12

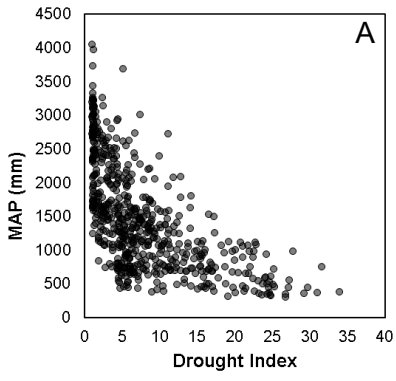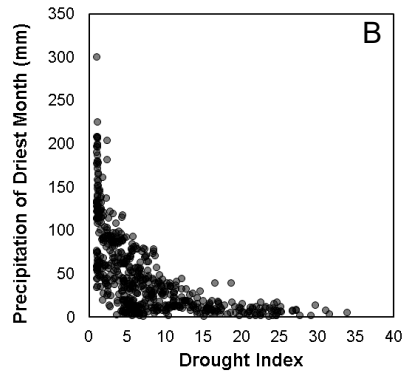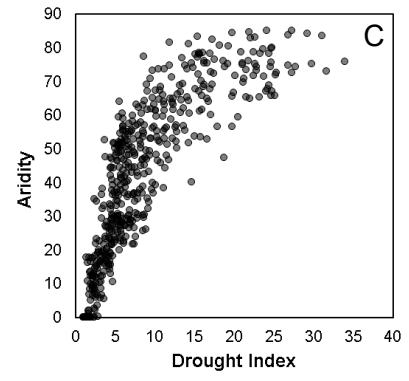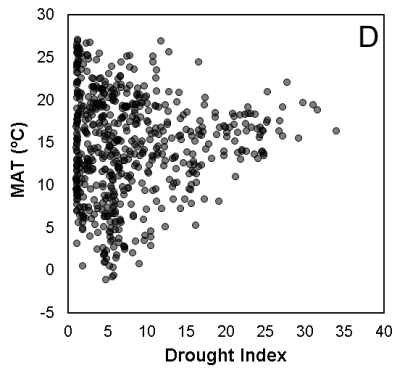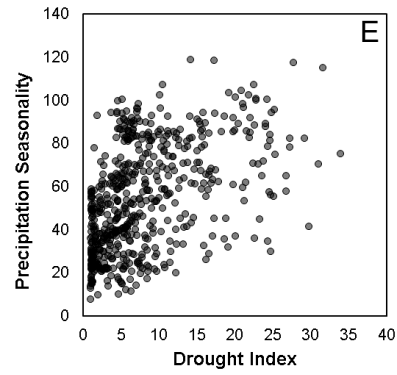

Supplement: sfig2_tpac102.pdf [file sfig2_tpac102.pdf]
