# Supplementary material for: At least it is a dry cold: the global distribution of freeze–thaw and drought stress and the traits that may impart poly-tolerance in conifers
Source: PubMed Central journal article supplement (PMC9833871; doi:10.1093/treephys/tpac102), 2022-09-12
Supplement: supplemental_table1_tpac102.pdf [file supplemental_table1_tpac102.pdf]

Supplemental Table S1: All conifer species within our dataset. “Occur coverage” is the the total FT-D space each species occupies as a percent of the total FT-D space occupied by conifers (2700 index units<sup>2</sup>). We quantified this space with a buffer around each point, as shown in Fig. 3. “Trait coverage” is the percent of the occurrence area where traits have been measured. “Realm” shows up to three realms where the species occurs most often. We included realms represented by at least 10 points or 5%. Species are grouped by their dominant realm and then sorted by decreasing trait coverage.

| Species                            | Occur coverage (%) | Trait coverage (%) | Realm                       |
|------------------------------------|--------------------|--------------------|-----------------------------|
| <i>Afrocarpus dawei</i>            | 3.1                | 0                  | Afrotropic                  |
| <i>Afrocarpus falcatus</i>         | 4.3                | 0                  | —                           |
| <i>Afrocarpus gracilior</i>        | 7.5                | 0                  | —                           |
| <i>Afrocarpus usambarensis</i>     | 3.4                | 0                  | —                           |
| <i>Juniperus procera</i>           | 10.4               | 0                  | —                           |
| <i>Podocarpus capuronii</i>        | 1.6                | 0                  | —                           |
| <i>Podocarpus elongatus</i>        | 5.8                | 0                  | — ; Australasia             |
| <i>Podocarpus henkelii</i>         | 8.3                | 0                  | — ; Australasia             |
| <i>Podocarpus humbertii</i>        | 1.5                | 0                  | —                           |
| <i>Podocarpus latifolius</i>       | 7.1                | 0                  | — ; Australasia             |
| <i>Podocarpus madagascariensis</i> | 3.0                | 0                  | —                           |
| <i>Podocarpus milanjanus</i>       | 6.3                | 0                  | —                           |
| <i>Podocarpus perrieri</i>         | 1.6                | 0                  | —                           |
| <i>Podocarpus rostratus</i>        | 1.1                | 0                  | —                           |
| <i>Widdringtonia nodiflora</i>     | 3.4                | 0                  | —                           |
| <i>Widdringtonia schwarzi</i>      | 6.1                | 0                  | — ; Australasia             |
| <i>Widdringtonia wallichii</i>     | 2.9                | 0                  | —                           |
| <i>Widdringtonia whytei</i>        | 1.3                | 0                  | — ; Australasia             |
| <i>Retrophyllum minus</i>          | 1.3                | 58.3               | Australasia                 |
| <i>Araucaria laubenfelsii</i>      | 1.5                | 51.2               | —                           |
| <i>Agathis ovata</i>               | 1.8                | 43.8               | —                           |
| <i>Falcatifolium taxoides</i>      | 1.8                | 43.8               | —                           |
| <i>Parasitaxus usta</i>            | 2.0                | 39.6               | —                           |
| <i>Callitris neocaledonica</i>     | 2.0                | 38.9               | —                           |
| <i>Callitris pancheri</i>          | 2.0                | 38.9               | —                           |
| <i>Callitris sulcata</i>           | 2.9                | 27.3               | —                           |
| <i>Callitris acuminata</i>         | 4.6                | 16.9               | —                           |
| <i>Callitris drummondii</i>        | 5.9                | 13.1               | —                           |
| <i>Dacrycarpus imbricatus</i>      | 5.9                | 13.1               | — ; Indomalayan; Oceania    |
| <i>Podocarpus laetus</i>           | 11.1               | 13.0               | —                           |
| <i>Pectinopitys ferruginea</i>     | 10.6               | 12.5               | —                           |
| <i>Pinus pinea</i>                 | 28.7               | 12.3               | — ; Palearctic              |
| <i>Dacrydium cupressinum</i>       | 15.8               | 11.5               | —                           |
| <i>Agathis australis</i>           | 11.8               | 11.3               | —                           |
| <i>Callitris arenaria</i>          | 7.6                | 10.2               | —                           |
| <i>Phyllocladus trichomanoides</i> | 13.1               | 10.2               | —                           |
| <i>Halocarpus kirkii</i>           | 7.7                | 8.7                | —                           |
| <i>Araucaria columnaris</i>        | 9.4                | 8.3                | —                           |
| <i>Callitris roei</i>              | 9.4                | 8.3                | —                           |
| <i>Pinus elliottii</i>             | 17.7               | 8.1                | — ; Nearctic                |
| <i>Pinus halepensis</i>            | 44.3               | 7.0                | — ; Palearctic              |
| <i>Pinus pinaster</i>              | 33.5               | 5.9                | — ; Palearctic              |
| <i>Callitris canescens</i>         | 15.1               | 5.2                | —                           |
| <i>Callitris muelleri</i>          | 15.1               | 5.1                | —                           |
| <i>Dacrycarpus dacrydioides</i>    | 15.0               | 4.4                | —                           |
| <i>Platycladus orientalis</i>      | 20.4               | 3.8                | — ; Palearctic; Nearctic    |
| <i>Cupressus torulosa</i>          | 21.8               | 3.6                | — ; Palearctic; Indomalayan |

continued

| Species                         | Occur coverage (%) | Trait coverage (%) | Realm                       |
|---------------------------------|--------------------|--------------------|-----------------------------|
| <i>Cryptomeria japonica</i>     | 18.9               | 3.5                | — ; Palearctic; Indomalayan |
| <i>Callitris verrucosa</i>      | 22.1               | 3.5                | —                           |
| <i>Callitris preissii</i>       | 28.0               | 2.8                | —                           |
| <i>Callitris columellaris</i>   | 42.3               | 1.8                | —                           |
| <i>Abies numidica</i>           | 2.5                | 0                  | — ; Palearctic              |
| <i>Acmopyle pancheri</i>        | 1.7                | 0                  | —                           |
| <i>Agathis atropurpurea</i>     | 2.7                | 0                  | —                           |
| <i>Agathis dammara</i>          | 3.1                | 0                  | — ; Indomalayan             |
| <i>Agathis labillardierei</i>   | 0.7                | 0                  | —                           |
| <i>Agathis lanceolata</i>       | 1.7                | 0                  | —                           |
| <i>Agathis microstachya</i>     | 2.1                | 0                  | —                           |
| <i>Agathis montana</i>          | 0.8                | 0                  | —                           |
| <i>Agathis moorei</i>           | 5.1                | 0                  | —                           |
| <i>Agathis robusta</i>          | 12.0               | 0                  | —                           |
| <i>Agathis silbae</i>           | 0.5                | 0                  | —                           |
| <i>Araucaria bernieri</i>       | 1.4                | 0                  | —                           |
| <i>Araucaria bidwillii</i>      | 27.4               | 0                  | —                           |
| <i>Araucaria biramulata</i>     | 2.1                | 0                  | —                           |
| <i>Araucaria cunninghamii</i>   | 17.5               | 0                  | —                           |
| <i>Araucaria heterophylla</i>   | 22.5               | 0                  | —                           |
| <i>Araucaria humboldtensis</i>  | 1.4                | 0                  | —                           |
| <i>Araucaria hunsteinii</i>     | 2.9                | 0                  | —                           |
| <i>Araucaria luxurians</i>      | 1.9                | 0                  | —                           |
| <i>Araucaria montana</i>        | 2.4                | 0                  | —                           |
| <i>Araucaria muelleri</i>       | 1.6                | 0                  | —                           |
| <i>Araucaria nemorosa</i>       | 0.8                | 0                  | —                           |
| <i>Araucaria rulei</i>          | 2.4                | 0                  | —                           |
| <i>Araucaria schmidii</i>       | 0.8                | 0                  | —                           |
| <i>Araucaria scopulorum</i>     | 1.9                | 0                  | —                           |
| <i>Araucaria subulata</i>       | 1.3                | 0                  | —                           |
| <i>Athrotaxis cupressoides</i>  | 18.7               | 0                  | —                           |
| <i>Athrotaxis selaginoides</i>  | 13.2               | 0                  | —                           |
| <i>Austrotaxus spicata</i>      | 1.7                | 0                  | —                           |
| <i>Callitris baileyi</i>        | 4.7                | 0                  | —                           |
| <i>Callitris endlicheri</i>     | 49.0               | 0                  | —                           |
| <i>Callitris gracilis</i>       | 27.6               | 0                  | —                           |
| <i>Callitris macleayana</i>     | 11.1               | 0                  | —                           |
| <i>Callitris monticola</i>      | 4.7                | 0                  | —                           |
| <i>Callitris oblonga</i>        | 16.6               | 0                  | —                           |
| <i>Callitris pyramidalis</i>    | 12.6               | 0                  | —                           |
| <i>Callitris rhomboidea</i>     | 44.4               | 0                  | —                           |
| <i>Cedrus atlantica</i>         | 20.6               | 0                  | — ; Palearctic              |
| <i>Cedrus deodara</i>           | 27.8               | 0                  | — ; Indomalayan; Palearctic |
| <i>Chamaecyparis lawsoniana</i> | 22.1               | 0                  | — ; Nearctic                |
| <i>Cupressus sempervirens</i>   | 36.7               | 0                  | — ; Palearctic              |
| <i>Dacrycarpus cinctus</i>      | 0.9                | 0                  | —                           |
| <i>Dacrycarpus compactus</i>    | 0.7                | 0                  | —                           |
| <i>Dacrycarpus expansus</i>     | 0.9                | 0                  | —                           |
| <i>Dacrycarpus steupii</i>      | 0.9                | 0                  | — ; Indomalayan             |
| <i>Dacrycarpus vieillardii</i>  | 2.0                | 0                  | —                           |
| <i>Dacrydium araucarioides</i>  | 1.3                | 0                  | —                           |
| <i>Dacrydium balansae</i>       | 1.7                | 0                  | —                           |
| <i>Dacrydium cornwallianum</i>  | 0.5                | 0                  | —                           |

continued

| Species                             | Occur coverage (%) | Trait coverage (%) | Realm                       |
|-------------------------------------|--------------------|--------------------|-----------------------------|
| <i>Dacrydium guillauminii</i>       | 0.8                | 0                  | —                           |
| <i>Dacrydium leptophyllum</i>       | 0.5                | 0                  | —                           |
| <i>Dacrydium lycopodioides</i>      | 1.3                | 0                  | —                           |
| <i>Dacrydium magnum</i>             | 0.9                | 0                  | —                           |
| <i>Dacrydium nidulum</i>            | 1.8                | 0                  | — ; Oceania                 |
| <i>Dacrydium novoguineense</i>      | 1.0                | 0                  | —                           |
| <i>Dacrydium spathoides</i>         | 0.5                | 0                  | —                           |
| <i>Diselma archeri</i>              | 4.9                | 0                  | —                           |
| <i>Falcatifolium papuanum</i>       | 1.0                | 0                  | —                           |
| <i>Falcatifolium sleumeri</i>       | 0.5                | 0                  | —                           |
| <i>Halocarpus bidwillii</i>         | 7.5                | 0                  | —                           |
| <i>Halocarpus biformis</i>          | 9.9                | 0                  | —                           |
| <i>Hesperocyparis arizonica</i>     | 40.3               | 0                  | — ; Nearctic                |
| <i>Hesperocyparis glabra</i>        | 7.4                | 0                  | —                           |
| <i>Hesperocyparis lusitanica</i>    | 28.5               | 0                  | — ; Neotropic; Nearctic     |
| <i>Hesperocyparis macrocarpa</i>    | 19.4               | 0                  | —                           |
| <i>Juniperus bermudiana</i>         | 6.5                | 0                  | —                           |
| <i>Juniperus taxifolia</i>          | 1.7                | 0                  | — ; Indomalayan; Palearctic |
| <i>Lagarostrobos franklinii</i>     | 9.3                | 0                  | —                           |
| <i>Lepidothamnus intermedius</i>    | 10.3               | 0                  | —                           |
| <i>Lepidothamnus laxifolius</i>     | 9.6                | 0                  | —                           |
| <i>Libocedrus austrocaledonica</i>  | 1.4                | 0                  | —                           |
| <i>Libocedrus bidwillii</i>         | 7.9                | 0                  | —                           |
| <i>Libocedrus chevalieri</i>        | 0.9                | 0                  | —                           |
| <i>Libocedrus plumosa</i>           | 13.6               | 0                  | —                           |
| <i>Libocedrus yateensis</i>         | 1.0                | 0                  | —                           |
| <i>Manoao colensoi</i>              | 11.4               | 0                  | —                           |
| <i>Metasequoia glyptostroboides</i> | 9.0                | 0                  | — ; Palearctic; Nearctic    |
| <i>Microcachrys tetragona</i>       | 4.7                | 0                  | —                           |
| <i>Papuacedrus papuana</i>          | 1.4                | 0                  | —                           |
| <i>Pectinopitys ferruginoides</i>   | 1.6                | 0                  | —                           |
| <i>Pectinopitys ladei</i>           | 1.1                | 0                  | —                           |
| <i>Pherosphaera fitzgeraldii</i>    | 3.9                | 0                  | —                           |
| <i>Pherosphaera hookeriana</i>      | 4.8                | 0                  | —                           |
| <i>Phyllocladus aspleniifolius</i>  | 14.0               | 0                  | —                           |
| <i>Phyllocladus hypophyllum</i>     | 2.0                | 0                  | — ; Indomalayan             |
| <i>Phyllocladus toatoa</i>          | 8.9                | 0                  | —                           |
| <i>Picea smithiana</i>              | 15.3               | 0                  | — ; Indomalayan; Palearctic |
| <i>Pinus canariensis</i>            | 18.2               | 0                  | — ; Palearctic              |
| <i>Pinus muricata</i>               | 16.4               | 0                  | — ; Nearctic                |
| <i>Pinus patula</i>                 | 25.6               | 0                  | — ; Neotropic; Nearctic     |
| <i>Pinus radiata</i>                | 53.4               | 0                  | —                           |
| <i>Pinus torreyana</i>              | 5.4                | 0                  | — ; Nearctic                |
| <i>Podocarpus acutifolius</i>       | 5.7                | 0                  | —                           |
| <i>Podocarpus archboldii</i>        | 1.4                | 0                  | —                           |
| <i>Podocarpus brassii</i>           | 0.7                | 0                  | —                           |
| <i>Podocarpus decumbens</i>         | 1.0                | 0                  | —                           |
| <i>Podocarpus dispermus</i>         | 1.9                | 0                  | —                           |
| <i>Podocarpus drouynianus</i>       | 6.1                | 0                  | —                           |
| <i>Podocarpus elatus</i>            | 23.7               | 0                  | —                           |
| <i>Podocarpus glaucus</i>           | 1.0                | 0                  | —                           |
| <i>Podocarpus gnidioides</i>        | 1.4                | 0                  | —                           |
| <i>Podocarpus grayae</i>            | 8.2                | 0                  | —                           |

continued

| Species                            | Occur coverage (%) | Trait coverage (%) | Realm                       |
|------------------------------------|--------------------|--------------------|-----------------------------|
| <i>Podocarpus insularis</i>        | 0.9                | 0                  | —                           |
| <i>Podocarpus ledermannii</i>      | 1.6                | 0                  | —                           |
| <i>Podocarpus levis</i>            | 1.4                | 0                  | — ; Indomalayan             |
| <i>Podocarpus longifoliolatus</i>  | 1.3                | 0                  | —                           |
| <i>Podocarpus lucienii</i>         | 1.6                | 0                  | —                           |
| <i>Podocarpus nivalis</i>          | 8.8                | 0                  | —                           |
| <i>Podocarpus novae-caledoniae</i> | 2.4                | 0                  | —                           |
| <i>Podocarpus orarius</i>          | 1.4                | 0                  | —                           |
| <i>Podocarpus pilgeri</i>          | 7.0                | 0                  | — ; Indomalayan             |
| <i>Podocarpus polyspermus</i>      | 1.5                | 0                  | —                           |
| <i>Podocarpus pseudobracteatus</i> | 0.9                | 0                  | —                           |
| <i>Podocarpus rubens</i>           | 1.2                | 0                  | — ; Indomalayan             |
| <i>Podocarpus rumphii</i>          | 3.7                | 0                  | — ; Indomalayan             |
| <i>Podocarpus salomonensis</i>     | 0.5                | 0                  | —                           |
| <i>Podocarpus smithii</i>          | 2.1                | 0                  | —                           |
| <i>Podocarpus spinulosus</i>       | 32.1               | 0                  | —                           |
| <i>Podocarpus sylvestris</i>       | 1.7                | 0                  | —                           |
| <i>Podocarpus totara</i>           | 15.0               | 0                  | —                           |
| <i>Prumnopitys taxifolia</i>       | 14.0               | 0                  | —                           |
| <i>Retrophyllum comptonii</i>      | 1.4                | 0                  | —                           |
| <i>Retrophyllum vitiense</i>       | 0.9                | 0                  | — ; Oceania                 |
| <i>Sundacarpus amarus</i>          | 3.4                | 0                  | — ; Indomalayan             |
| <i>Wollemia nobilis</i>            | 2.1                | 0                  | —                           |
| <i>Pinus krempfi</i>               | 1.1                | 67.7               | Indomalayan                 |
| <i>Pinus dalatensis</i>            | 1.5                | 51.2               | —                           |
| <i>Agathis borneensis</i>          | 1.8                | 27.1               | —                           |
| <i>Nageia wallichiana</i>          | 4.2                | 18.6               | — ; Australasia             |
| <i>Dacrydium elatum</i>            | 4.4                | 17.8               | —                           |
| <i>Podocarpus neriifolius</i>      | 14.6               | 10.7               | — ; Australasia; Palearctic |
| <i>Pinus kesiya</i>                | 7.8                | 10.0               | — ; Australasia             |
| <i>Nageia nagi</i>                 | 12.0               | 6.5                | — ; Palearctic              |
| <i>Fokienia hodginsii</i>          | 16.0               | 4.8                | — ; Palearctic; Australasia |
| <i>Pinus massoniana</i>            | 16.3               | 4.8                | — ; Palearctic; Australasia |
| <i>Taxus wallichiana</i>           | 16.8               | 4.6                | — ; Palearctic; Australasia |
| <i>Pinus roxburghii</i>            | 20.9               | 3.7                | — ; Australasia; Palearctic |
| <i>Abies beshanzuensis</i>         | 0.5                | 0                  | —                           |
| <i>Abies fanjingshanensis</i>      | 1.0                | 0                  | —                           |
| <i>Abies kawakamii</i>             | 1.4                | 0                  | —                           |
| <i>Abies pindrow</i>               | 16.6               | 0                  | — ; Australasia; Palearctic |
| <i>Abies spectabilis</i>           | 13.6               | 0                  | — ; Palearctic; Australasia |
| <i>Abies yuanbaoshanensis</i>      | 0.8                | 0                  | —                           |
| <i>Abies ziyuanensis</i>           | 1.1                | 0                  | —                           |
| <i>Agathis flavescens</i>          | 0.7                | 0                  | —                           |
| <i>Agathis kinabaluensis</i>       | 0.7                | 0                  | —                           |
| <i>Agathis lenticula</i>           | 0.7                | 0                  | —                           |
| <i>Agathis orbicula</i>            | 0.5                | 0                  | —                           |
| <i>Amentotaxus argotaenia</i>      | 13.5               | 0                  | — ; Palearctic              |
| <i>Amentotaxus assamica</i>        | 2.1                | 0                  | —                           |
| <i>Amentotaxus formosana</i>       | 1.5                | 0                  | —                           |
| <i>Amentotaxus hatuyenensis</i>    | 0.8                | 0                  | —                           |
| <i>Amentotaxus poilanei</i>        | 0.8                | 0                  | —                           |
| <i>Amentotaxus yunnanensis</i>     | 5.2                | 0                  | — ; Palearctic              |
| <i>Calocedrus formosana</i>        | 1.4                | 0                  | —                           |

continued

| Species                          | Occur coverage (%) | Trait coverage (%) | Realm                       |
|----------------------------------|--------------------|--------------------|-----------------------------|
| <i>Calocedrus macrolepis</i>     | 7.2                | 0                  | — ; Palearctic              |
| <i>Calocedrus rupestris</i>      | 4.3                | 0                  | —                           |
| <i>Cathaya argyrophylla</i>      | 2.9                | 0                  | — ; Palearctic              |
| <i>Cephalotaxus hainanensis</i>  | 1.0                | 0                  | —                           |
| <i>Cephalotaxus mannii</i>       | 10.3               | 0                  | — ; Palearctic              |
| <i>Chamaecyparis formosensis</i> | 3.1                | 0                  | — ; Australasia             |
| <i>Cunninghamia konishii</i>     | 6.2                | 0                  | — ; Australasia             |
| <i>Cupressus cashmeriana</i>     | 9.4                | 0                  | — ; Australasia             |
| <i>Dacrycarpus cumingii</i>      | 2.0                | 0                  | —                           |
| <i>Dacrycarpus kinabaluensis</i> | 0.7                | 0                  | —                           |
| <i>Dacrydium beccarii</i>        | 1.6                | 0                  | — ; Australasia             |
| <i>Dacrydium comosum</i>         | 0.7                | 0                  | —                           |
| <i>Dacrydium ericoides</i>       | 0.5                | 0                  | —                           |
| <i>Dacrydium gibbsiae</i>        | 0.7                | 0                  | —                           |
| <i>Dacrydium gracile</i>         | 0.7                | 0                  | —                           |
| <i>Dacrydium medium</i>          | 0.9                | 0                  | —                           |
| <i>Dacrydium pectinatum</i>      | 2.7                | 0                  | —                           |
| <i>Dacrydium xanthandrum</i>     | 0.9                | 0                  | — ; Australasia             |
| <i>Falcatifolium angustum</i>    | 0.5                | 0                  | —                           |
| <i>Falcatifolium falciforme</i>  | 1.3                | 0                  | —                           |
| <i>Falcatifolium gruezoii</i>    | 2.0                | 0                  | — ; Australasia             |
| <i>Glyptostrobus pensilis</i>    | 8.1                | 0                  | —                           |
| <i>Keteleeria fortunei</i>       | 13.4               | 0                  | — ; Australasia; Palearctic |
| <i>Nageia fleuryi</i>            | 4.6                | 0                  | —                           |
| <i>Nageia maxima</i>             | 0.5                | 0                  | —                           |
| <i>Nageia motleyi</i>            | 1.8                | 0                  | —                           |
| <i>Nothotsuga longibracteata</i> | 8.0                | 0                  | —                           |
| <i>Picea morrisonicola</i>       | 1.4                | 0                  | — ; Australasia             |
| <i>Picea spinulosa</i>           | 6.3                | 0                  | — ; Palearctic; Australasia |
| <i>Pinus amamiana</i>            | 0.7                | 0                  | —                           |
| <i>Pinus bhutanica</i>           | 6.1                | 0                  | — ; Palearctic              |
| <i>Pinus fenzeliana</i>          | 10.7               | 0                  | —                           |
| <i>Pinus hwangshanensis</i>      | 8.5                | 0                  | — ; Palearctic; Australasia |
| <i>Pinus latteri</i>             | 4.1                | 0                  | —                           |
| <i>Pinus luchuensis</i>          | 3.9                | 0                  | — ; Australasia             |
| <i>Pinus merkusii</i>            | 3.1                | 0                  | —                           |
| <i>Pinus morrisonicola</i>       | 3.4                | 0                  | — ; Australasia             |
| <i>Pinus taiwanensis</i>         | 3.4                | 0                  | — ; Australasia             |
| <i>Pinus wallichiana</i>         | 22.5               | 0                  | — ; Palearctic; Australasia |
| <i>Pinus wangii</i>              | 1.9                | 0                  | — ; Palearctic              |
| <i>Podocarpus atjehensis</i>     | 1.1                | 0                  | —                           |
| <i>Podocarpus borneensis</i>     | 0.5                | 0                  | —                           |
| <i>Podocarpus bracteatus</i>     | 2.5                | 0                  | — ; Australasia             |
| <i>Podocarpus brevifolius</i>    | 0.5                | 0                  | —                           |
| <i>Podocarpus chingianus</i>     | 0.8                | 0                  | —                           |
| <i>Podocarpus confertus</i>      | 0.5                | 0                  | —                           |
| <i>Podocarpus costalis</i>       | 0.9                | 0                  | —                           |
| <i>Podocarpus deflexus</i>       | 0.7                | 0                  | —                           |
| <i>Podocarpus fasciculus</i>     | 1.9                | 0                  | —                           |
| <i>Podocarpus gibbsiae</i>       | 0.7                | 0                  | —                           |
| <i>Podocarpus globulus</i>       | 0.5                | 0                  | —                           |
| <i>Podocarpus laubenfelsii</i>   | 0.7                | 0                  | —                           |
| <i>Podocarpus lophatus</i>       | 1.6                | 0                  | —                           |

continued

| Species                             | Occur coverage (%) | Trait coverage (%) | Realm                       |
|-------------------------------------|--------------------|--------------------|-----------------------------|
| <i>Podocarpus macrocarpus</i>       | 3.1                | 0                  | —                           |
| <i>Podocarpus micropedunculatus</i> | 0.5                | 0                  | —                           |
| <i>Podocarpus nakaii</i>            | 2.0                | 0                  | —                           |
| <i>Podocarpus palawanensis</i>      | 0.8                | 0                  | —                           |
| <i>Podocarpus polystachyus</i>      | 2.3                | 0                  | — ; Australasia             |
| <i>Podocarpus ramosii</i>           | 1.2                | 0                  | —                           |
| <i>Podocarpus ridleyi</i>           | 1.4                | 0                  | —                           |
| <i>Podocarpus spathoides</i>        | 1.0                | 0                  | —                           |
| <i>Podocarpus teysmannii</i>        | 1.4                | 0                  | —                           |
| <i>Pseudotaxus chienii</i>          | 5.4                | 0                  | — ; Palearctic              |
| <i>Taiwania cryptomerioides</i>     | 8.0                | 0                  | — ; Palearctic; Australasia |
| <i>Taxus contorta</i>               | 14.4               | 0                  | — ; Palearctic              |
| <i>Torreya jackii</i>               | 2.4                | 0                  | — ; Palearctic              |
| <i>Xanthocyparis vietnamensis</i>   | 2.0                | 0                  | —                           |
| <i>Abies fraseri</i>                | 2.3                | 29.5               | Nearctic                    |
| <i>Picea chihuahuana</i>            | 2.7                | 28.8               | —                           |
| <i>Larix occidentalis</i>           | 9.2                | 26.5               | —                           |
| <i>Picea mariana</i>                | 9.0                | 23.8               | —                           |
| <i>Abies lasiocarpa</i>             | 17.2               | 22.4               | —                           |
| <i>Picea laxa</i>                   | 7.7                | 22.0               | —                           |
| <i>Juniperus flaccida</i>           | 7.9                | 19.8               | — ; Neotropic               |
| <i>Sequoia sempervirens</i>         | 22.9               | 18.9               | — ; Australasia             |
| <i>Juniperus monticola</i>          | 4.1                | 18.9               | — ; Neotropic               |
| <i>Juniperus scopulorum</i>         | 20.1               | 18.8               | —                           |
| <i>Pinus contorta</i>               | 29.0               | 18.0               | — ; Australasia             |
| <i>Pseudotsuga menziesii</i>        | 43.9               | 17.1               | — ; Australasia             |
| <i>Tsuga heterophylla</i>           | 16.0               | 16.9               | — ; Australasia             |
| <i>Pinus virginiana</i>             | 10.0               | 15.6               | — ; Australasia             |
| <i>Pinus banksiana</i>              | 10.9               | 13.9               | — ; Australasia             |
| <i>Pinus ponderosa</i>              | 38.9               | 13.6               | — ; Australasia             |
| <i>Pinus resinosa</i>               | 7.6                | 13.6               | — ; Australasia             |
| <i>Pinus palustris</i>              | 17.8               | 13.1               | — ; Australasia             |
| <i>Pinus albicaulis</i>             | 12.1               | 12.8               | —                           |
| <i>Juniperus monosperma</i>         | 20.0               | 12.6               | —                           |
| <i>Larix laricina</i>               | 6.2                | 12.5               | —                           |
| <i>Larix lyallii</i>                | 6.3                | 12.3               | —                           |
| <i>Abies balsamea</i>               | 6.4                | 12.1               | —                           |
| <i>Picea engelmannii</i>            | 19.7               | 11.8               | —                           |
| <i>Pinus edulis</i>                 | 23.0               | 11.6               | —                           |
| <i>Picea rubens</i>                 | 6.1                | 10.9               | —                           |
| <i>Juniperus ashei</i>              | 11.1               | 10.7               | —                           |
| <i>Thuja occidentalis</i>           | 11.4               | 10.4               | — ; Australasia             |
| <i>Juniperus osteosperma</i>        | 23.6               | 9.9                | —                           |
| <i>Pinus strobus</i>                | 17.5               | 8.3                | — ; Neotropic; Australasia  |
| <i>Juniperus deppeana</i>           | 19.6               | 8.0                | — ; Neotropic               |
| <i>Pinus taeda</i>                  | 19.0               | 7.4                | — ; Australasia             |
| <i>Tsuga canadensis</i>             | 9.1                | 7.3                | — ; Australasia             |
| <i>Abies grandis</i>                | 16.1               | 7.1                | — ; Australasia             |
| <i>Taxodium distichum</i>           | 21.9               | 7.1                | — ; Australasia; Neotropic  |
| <i>Abies amabilis</i>               | 11.2               | 6.9                | — ; Australasia             |
| <i>Pinus rigida</i>                 | 9.6                | 6.9                | — ; Australasia             |
| <i>Juniperus virginiana</i>         | 23.6               | 6.6                | — ; Australasia             |
| <i>Picea sitchensis</i>             | 11.8               | 6.6                | — ; Australasia             |

continued

| Species                             | Occur coverage (%) | Trait coverage (%) | Realm                        |
|-------------------------------------|--------------------|--------------------|------------------------------|
| <i>Thuja plicata</i>                | 19.1               | 6.0                | — ; Australasia              |
| <i>Juniperus arizonica</i>          | 13.2               | 5.9                | —                            |
| <i>Pinus arizonica</i>              | 13.3               | 5.8                | —                            |
| <i>Pinus serotina</i>               | 13.4               | 5.8                | — ; Australasia              |
| <i>Pinus echinata</i>               | 14.2               | 5.5                | — ; Australasia              |
| <i>Juniperus pinchotii</i>          | 15.3               | 5.1                | —                            |
| <i>Juniperus occidentalis</i>       | 16.4               | 4.8                | —                            |
| <i>Pinus monticola</i>              | 16.8               | 4.6                | — ; Australasia              |
| <i>Pinus leiophylla</i>             | 17.2               | 4.5                | — ; Neotropic                |
| <i>Pinus strobiformis</i>           | 17.3               | 4.5                | — ; Neotropic                |
| <i>Pinus cembroides</i>             | 21.6               | 3.6                | — ; Neotropic                |
| <i>Juniperus californica</i>        | 24.2               | 3.2                | —                            |
| <i>Pinus flexilis</i>               | 28.9               | 2.7                | — ; Australasia              |
| <i>Abies concolor</i>               | 32.8               | 2.4                | — ; Australasia              |
| <i>Pinus monophylla</i>             | 37.3               | 2.1                | —                            |
| <i>Abies bracteata</i>              | 5.8                | 0                  | — ; Australasia              |
| <i>Abies durangensis</i>            | 5.8                | 0                  | —                            |
| <i>Abies hidalgensis</i>            | 1.0                | 0                  | — ; Neotropic                |
| <i>Abies magnifica</i>              | 13.7               | 0                  | — ; Australasia              |
| <i>Abies procera</i>                | 10.0               | 0                  | — ; Australasia              |
| <i>Abies vejarii</i>                | 4.6                | 0                  | — ; Australasia              |
| <i>Callitropsis nootkatensis</i>    | 8.3                | 0                  | —                            |
| <i>Calocedrus decurrens</i>         | 26.9               | 0                  | — ; Australasia              |
| <i>Chamaecyparis thyoides</i>       | 11.3               | 0                  | — ; Australasia              |
| <i>Hesperocyparis bakeri</i>        | 2.6                | 0                  | —                            |
| <i>Hesperocyparis goveniana</i>     | 10.3               | 0                  | — ; Australasia              |
| <i>Hesperocyparis guadalupensis</i> | 3.4                | 0                  | —                            |
| <i>Hesperocyparis macnabiana</i>    | 6.6                | 0                  | —                            |
| <i>Hesperocyparis sargentii</i>     | 12.6               | 0                  | —                            |
| <i>Juniperus angosturana</i>        | 3.3                | 0                  | —                            |
| <i>Juniperus blancoi</i>            | 5.5                | 0                  | — ; Neotropic                |
| <i>Juniperus coahuilensis</i>       | 7.0                | 0                  | —                            |
| <i>Juniperus durangensis</i>        | 6.9                | 0                  | —                            |
| <i>Juniperus horizontalis</i>       | 14.3               | 0                  | —                            |
| <i>Juniperus procumbens</i>         | 3.6                | 0                  | — ; Australasia; Indomalayan |
| <i>Juniperus saltillensis</i>       | 4.7                | 0                  | —                            |
| <i>Picea breweriana</i>             | 5.3                | 0                  | —                            |
| <i>Picea martinezii</i>             | 2.0                | 0                  | —                            |
| <i>Picea pungens</i>                | 15.7               | 0                  | — ; Australasia              |
| <i>Pinus aristata</i>               | 8.8                | 0                  | — ; Australasia              |
| <i>Pinus attenuata</i>              | 25.0               | 0                  | — ; Australasia              |
| <i>Pinus balfouriana</i>            | 4.7                | 0                  | —                            |
| <i>Pinus clausa</i>                 | 7.0                | 0                  | — ; Australasia              |
| <i>Pinus coulteri</i>               | 17.5               | 0                  | — ; Australasia              |
| <i>Pinus culminicola</i>            | 2.6                | 0                  | —                            |
| <i>Pinus durangensis</i>            | 12.1               | 0                  | — ; Neotropic; Australasia   |
| <i>Pinus engelmannii</i>            | 17.1               | 0                  | — ; Australasia              |
| <i>Pinus glabra</i>                 | 7.8                | 0                  | —                            |
| <i>Pinus greggii</i>                | 7.0                | 0                  | — ; Neotropic; Australasia   |
| <i>Pinus jeffreyi</i>               | 25.4               | 0                  | — ; Australasia              |
| <i>Pinus lambertiana</i>            | 24.3               | 0                  | — ; Australasia              |
| <i>Pinus longaeva</i>               | 11.3               | 0                  | —                            |
| <i>Pinus lumholtzii</i>             | 6.6                | 0                  | — ; Neotropic                |

continued

| Species                         | Occur coverage (%) | Trait coverage (%) | Realm                     |
|---------------------------------|--------------------|--------------------|---------------------------|
| <i>Pinus maximartinezii</i>     | 2.2                | 0                  | — ; Neotropic             |
| <i>Pinus nelsonii</i>           | 2.8                | 0                  | —                         |
| <i>Pinus pinceana</i>           | 3.9                | 0                  | —                         |
| <i>Pinus pungens</i>            | 5.3                | 0                  | —                         |
| <i>Pinus quadrifolia</i>        | 6.0                | 0                  | —                         |
| <i>Pinus remota</i>             | 7.9                | 0                  | —                         |
| <i>Pinus sabiniana</i>          | 25.1               | 0                  | — ; Australasia           |
| <i>Pseudotsuga macrocarpa</i>   | 7.1                | 0                  | —                         |
| <i>Sequoiadendron giganteum</i> | 19.9               | 0                  | — ; Australasia           |
| <i>Taxus brevifolia</i>         | 15.8               | 0                  | —                         |
| <i>Taxus canadensis</i>         | 5.8                | 0                  | —                         |
| <i>Taxus floridana</i>          | 1.0                | 0                  | —                         |
| <i>Torreya californica</i>      | 17.3               | 0                  | — ; Australasia           |
| <i>Torreya taxifolia</i>        | 1.1                | 0                  | —                         |
| <i>Tsuga caroliniana</i>        | 2.7                | 0                  | —                         |
| <i>Tsuga mertensiana</i>        | 11.0               | 0                  | —                         |
| <i>Juniperus barbadensis</i>    | 3.4                | 35.5               | Neotropic                 |
| <i>Podocarpus salicifolius</i>  | 2.9                | 26.9               | —                         |
| <i>Podocarpus nubigenus</i>     | 8.1                | 19.1               | —                         |
| <i>Pinus caribaea</i>           | 6.1                | 12.8               | — ; Australasia           |
| <i>Prumnopitys andina</i>       | 6.3                | 12.4               | —                         |
| <i>Pinus hartwegii</i>          | 8.6                | 9.1                | — ; Nearctic; Australasia |
| <i>Pinus pseudostrobus</i>      | 9.8                | 7.9                | — ; Nearctic; Australasia |
| <i>Fitzroya cupressoides</i>    | 9.1                | 7.3                | —                         |
| <i>Pinus devoniana</i>          | 10.7               | 7.2                | — ; Nearctic; Australasia |
| <i>Saxegothaea conspicua</i>    | 12.6               | 6.2                | —                         |
| <i>Podocarpus salignus</i>      | 13.6               | 5.7                | — ; Australasia           |
| <i>Austrocedrus chilensis</i>   | 15.3               | 5.1                | —                         |
| <i>Abies guatemalensis</i>      | 4.1                | 0                  | —                         |
| <i>Abies hickelii</i>           | 3.8                | 0                  | —                         |
| <i>Abies religiosa</i>          | 6.9                | 0                  | — ; Nearctic; Australasia |
| <i>Araucaria angustifolia</i>   | 7.4                | 0                  | — ; Australasia           |
| <i>Araucaria araucana</i>       | 11.5               | 0                  | — ; Australasia           |
| <i>Juniperus comitana</i>       | 1.5                | 0                  | —                         |
| <i>Juniperus gamboana</i>       | 3.6                | 0                  | —                         |
| <i>Juniperus gracilior</i>      | 3.2                | 0                  | —                         |
| <i>Juniperus jaliscana</i>      | 1.1                | 0                  | —                         |
| <i>Juniperus saxicola</i>       | 0.8                | 0                  | —                         |
| <i>Juniperus standleyi</i>      | 1.7                | 0                  | —                         |
| <i>Lepidothamnus fonkii</i>     | 5.3                | 0                  | —                         |
| <i>Pectinopitys exigua</i>      | 2.2                | 0                  | —                         |
| <i>Pectinopitys harmsiana</i>   | 4.9                | 0                  | —                         |
| <i>Pectinopitys standleyi</i>   | 0.9                | 0                  | —                         |
| <i>Pilgerodendron uviferum</i>  | 7.3                | 0                  | —                         |
| <i>Pinus ayacahuite</i>         | 10.5               | 0                  | — ; Australasia; Nearctic |
| <i>Pinus cubensis</i>           | 3.1                | 0                  | —                         |
| <i>Pinus douglasiana</i>        | 5.1                | 0                  | — ; Nearctic              |
| <i>Pinus herrerae</i>           | 6.1                | 0                  | — ; Nearctic              |
| <i>Pinus jaliscana</i>          | 2.6                | 0                  | —                         |
| <i>Pinus lawsonii</i>           | 7.1                | 0                  | — ; Australasia           |
| <i>Pinus luzmariae</i>          | 3.7                | 0                  | — ; Nearctic              |
| <i>Pinus maximinoi</i>          | 8.2                | 0                  | —                         |
| <i>Pinus montezumae</i>         | 11.8               | 0                  | — ; Nearctic; Australasia |



continued

| Species                                         | Occur coverage (%) | Trait coverage (%) | Realm                    |
|-------------------------------------------------|--------------------|--------------------|--------------------------|
| <i>Pinus occidentalis</i>                       | 5.1                | 0                  | —                        |
| <i>Pinus oocarpa</i>                            | 9.6                | 0                  | — ; Nearctic             |
| <i>Pinus praetermissa</i>                       | 4.8                | 0                  | — ; Nearctic             |
| <i>Pinus pringlei</i>                           | 5.9                | 0                  | —                        |
| <i>Pinus rzedowskii</i>                         | 1.1                | 0                  | —                        |
| <i>Pinus tecunumanii</i>                        | 5.4                | 0                  | —                        |
| <i>Pinus teocote</i>                            | 10.2               | 0                  | — ; Nearctic             |
| <i>Pinus tropicalis</i>                         | 1.3                | 0                  | —                        |
| <i>Podocarpus acuminatus</i>                    | 1.3                | 0                  | —                        |
| <i>Podocarpus angustifolius</i>                 | 2.3                | 0                  | —                        |
| <i>Podocarpus aracensis</i>                     | 1.6                | 0                  | —                        |
| <i>Podocarpus brasiliensis</i>                  | 2.8                | 0                  | —                        |
| <i>Podocarpus buchii</i>                        | 2.6                | 0                  | —                        |
| <i>Podocarpus celatus</i>                       | 3.0                | 0                  | —                        |
| <i>Podocarpus coriaceus</i>                     | 1.8                | 0                  | —                        |
| <i>Podocarpus costaricensis</i>                 | 1.1                | 0                  | —                        |
| <i>Podocarpus ekmanii</i>                       | 1.9                | 0                  | —                        |
| <i>Podocarpus glomeratus</i>                    | 5.4                | 0                  | —                        |
| <i>Podocarpus guatemalensis</i>                 | 3.8                | 0                  | —                        |
| <i>Podocarpus hispaniolensis</i>                | 1.1                | 0                  | —                        |
| <i>Podocarpus lambertii</i>                     | 4.7                | 0                  | —                        |
| <i>Podocarpus magnifolius</i>                   | 3.6                | 0                  | —                        |
| <i>Podocarpus matudae</i>                       | 5.3                | 0                  | —                        |
| <i>Podocarpus oleifolius</i>                    | 4.4                | 0                  | —                        |
| <i>Podocarpus parlatorei</i>                    | 7.2                | 0                  | —                        |
| <i>Podocarpus pendulifolius</i>                 | 1.5                | 0                  | —                        |
| <i>Podocarpus purdieanus</i>                    | 1.0                | 0                  | —                        |
| <i>Podocarpus roraimae</i>                      | 1.4                | 0                  | —                        |
| <i>Podocarpus rusbyi</i>                        | 2.7                | 0                  | —                        |
| <i>Podocarpus sellowii</i>                      | 1.8                | 0                  | —                        |
| <i>Podocarpus sprucei</i>                       | 1.9                | 0                  | —                        |
| <i>Podocarpus steyermarkii</i>                  | 2.3                | 0                  | —                        |
| <i>Podocarpus tepuiensis</i>                    | 2.1                | 0                  | —                        |
| <i>Podocarpus transiens</i>                     | 2.3                | 0                  | —                        |
| <i>Podocarpus trinitensis</i>                   | 1.1                | 0                  | —                        |
| <i>Podocarpus urbanii</i>                       | 0.9                | 0                  | —                        |
| <i>Prumnopitys montana</i>                      | 3.9                | 0                  | —                        |
| <i>Retrophyllum piresii</i>                     | 0.8                | 0                  | —                        |
| <i>Retrophyllum rospigliosii</i>                | 4.3                | 0                  | —                        |
| <i>Taxodium distichum</i> var. <i>mexicanum</i> | 7.6                | 0                  | — ; Nearctic             |
| <i>Taxus globosa</i>                            | 4.9                | 0                  | — ; Nearctic             |
| <i>Acmopyle sahniana</i>                        | 0.5                | 0                  | Oceania                  |
| <i>Agathis macrophylla</i>                      | 4.5                | 0                  | — ; Australasia          |
| <i>Dacrydium nausoriense</i>                    | 1.2                | 0                  | —                        |
| <i>Podocarpus affinis</i>                       | 0.5                | 0                  | —                        |
| <i>Podocarpus pallidus</i>                      | 0.5                | 0                  | —                        |
| <i>Pinus koraiensis</i>                         | 5.2                | 52.5               | Paelearctic; Australasia |
| <i>Larix decidua</i>                            | 9.3                | 36.4               | — ; Australasia          |
| <i>Picea abies</i>                              | 14.4               | 31.7               | — ; Australasia          |
| <i>Picea koraiensis</i>                         | 2.5                | 31.3               | —                        |
| <i>Pinus sylvestris</i>                         | 23.8               | 29.9               | — ; Australasia          |
| <i>Abies alba</i>                               | 8.6                | 24.9               | — ; Australasia          |
| <i>Larix gmelinii</i>                           | 10.3               | 22.7               | —                        |

continued

| Species                          | Occur coverage (%) | Trait coverage (%) | Realm                        |
|----------------------------------|--------------------|--------------------|------------------------------|
| <i>Abies nephrolepis</i>         | 4.1                | 18.8               | —                            |
| <i>Abies holophylla</i>          | 4.4                | 17.6               | — ; Australasia              |
| <i>Pinus densiflora</i>          | 11.3               | 15.0               | — ; Australasia              |
| <i>Pinus sibirica</i>            | 6.3                | 12.4               | —                            |
| <i>Abies mariesii</i>            | 4.3                | 11.3               | — ; Australasia              |
| <i>Pinus cembra</i>              | 4.6                | 10.4               | — ; Australasia              |
| <i>Larix kaempferi</i>           | 7.7                | 10.1               | — ; Australasia              |
| <i>Picea obovata</i>             | 7.9                | 9.9                | —                            |
| <i>Pinus thunbergii</i>          | 8.0                | 9.8                | — ; Australasia              |
| <i>Pinus nigra</i>               | 28.6               | 9.6                | — ; Australasia              |
| <i>Abies firma</i>               | 7.2                | 9.2                | — ; Australasia              |
| <i>Pinus pumila</i>              | 5.3                | 9.2                | —                            |
| <i>Abies sibirica</i>            | 9.4                | 8.3                | —                            |
| <i>Abies fargesii</i>            | 9.5                | 8.2                | — ; Australasia              |
| <i>Pinus tabuliformis</i>        | 19.4               | 8.0                | — ; Australasia              |
| <i>Taxus baccata</i>             | 27.7               | 7.5                | — ; Australasia              |
| <i>Keteleeria evelyniana</i>     | 10.8               | 7.2                | — ; Indomalayan              |
| <i>Larix sibirica</i>            | 10.9               | 7.1                | —                            |
| <i>Chamaecyparis obtusa</i>      | 12.0               | 6.5                | — ; Australasia; Indomalayan |
| <i>Tetraclinis articulata</i>    | 13.9               | 5.6                | —                            |
| <i>Juniperus communis</i>        | 31.1               | 5.4                | — ; Nearctic                 |
| <i>Pinus mugo</i>                | 10.1               | 4.7                | — ; Australasia              |
| <i>Cedrus libani</i>             | 16.8               | 4.6                | — ; Australasia              |
| <i>Juniperus thurifera</i>       | 17.5               | 4.4                | —                            |
| <i>Juniperus chinensis</i>       | 24.4               | 3.2                | — ; Australasia; Indomalayan |
| <i>Juniperus oxycedrus</i>       | 30.7               | 2.5                | —                            |
| <i>Abies cephalonica</i>         | 9.0                | 0                  | — ; Australasia              |
| <i>Abies chensiensis</i>         | 12.4               | 0                  | —                            |
| <i>Abies cilicica</i>            | 9.0                | 0                  | —                            |
| <i>Abies delavayi</i>            | 12.1               | 0                  | — ; Indomalayan; Australasia |
| <i>Abies densa</i>               | 9.3                | 0                  | — ; Indomalayan              |
| <i>Abies fabri</i>               | 4.6                | 0                  | —                            |
| <i>Abies forrestii</i>           | 13.9               | 0                  | —                            |
| <i>Abies homolepis</i>           | 5.1                | 0                  | — ; Australasia              |
| <i>Abies koreana</i>             | 2.5                | 0                  | — ; Australasia              |
| <i>Abies nebrodensis</i>         | 2.1                | 0                  | — ; Australasia              |
| <i>Abies nordmanniana</i>        | 13.1               | 0                  | — ; Australasia              |
| <i>Abies pinsapo</i>             | 8.1                | 0                  | — ; Australasia              |
| <i>Abies recurvata</i>           | 9.4                | 0                  | — ; Australasia              |
| <i>Abies sachalinensis</i>       | 1.9                | 0                  | —                            |
| <i>Abies squamata</i>            | 8.2                | 0                  | —                            |
| <i>Abies veitchii</i>            | 4.4                | 0                  | — ; Australasia              |
| <i>Cephalotaxus fortunei</i>     | 19.6               | 0                  | — ; Indomalayan              |
| <i>Cephalotaxus griffithii</i>   | 0.8                | 0                  | —                            |
| <i>Cephalotaxus harringtonia</i> | 19.1               | 0                  | — ; Indomalayan; Australasia |
| <i>Cephalotaxus nana</i>         | 2.5                | 0                  | — ; Indomalayan              |
| <i>Cephalotaxus oliveri</i>      | 5.1                | 0                  | — ; Indomalayan              |
| <i>Chamaecyparis pisifera</i>    | 11.5               | 0                  | — ; Australasia              |
| <i>Cunninghamia lanceolata</i>   | 20.0               | 0                  | — ; Indomalayan; Australasia |
| <i>Cupressus chengiana</i>       | 6.6                | 0                  | —                            |
| <i>Cupressus duclouxiana</i>     | 13.3               | 0                  | — ; Australasia              |
| <i>Cupressus dupreziana</i>      | 3.8                | 0                  | —                            |
| <i>Cupressus pendula</i>         | 7.3                | 0                  | — ; Indomalayan              |

continued

| Species                                          | Occur coverage (%) | Trait coverage (%) | Realm                        |
|--------------------------------------------------|--------------------|--------------------|------------------------------|
| <i>Juniperus brevifolia</i>                      | 1.9                | 0                  | —                            |
| <i>Juniperus cedrus</i>                          | 2.2                | 0                  | —                            |
| <i>Juniperus chinensis</i> var. <i>chinensis</i> | 2.3                | 0                  | —                            |
| <i>Juniperus convallium</i>                      | 12.9               | 0                  | —                            |
| <i>Juniperus drupacea</i>                        | 10.4               | 0                  | —                            |
| <i>Juniperus excelsa</i>                         | 38.2               | 0                  | —                            |
| <i>Juniperus foetidissima</i>                    | 16.1               | 0                  | —                            |
| <i>Juniperus formosana</i>                       | 19.3               | 0                  | — ; Indomalayan              |
| <i>Juniperus indica</i>                          | 17.9               | 0                  | — ; Indomalayan              |
| <i>Juniperus komarovii</i>                       | 7.4                | 0                  | —                            |
| <i>Juniperus phoenicea</i>                       | 33.8               | 0                  | —                            |
| <i>Juniperus pingii</i>                          | 19.0               | 0                  | —                            |
| <i>Juniperus przewalskii</i>                     | 11.8               | 0                  | —                            |
| <i>Juniperus pseudosabina</i>                    | 14.1               | 0                  | —                            |
| <i>Juniperus recurva</i>                         | 22.3               | 0                  | — ; Indomalayan              |
| <i>Juniperus rigida</i>                          | 14.1               | 0                  | — ; Australasia              |
| <i>Juniperus sabina</i>                          | 24.5               | 0                  | —                            |
| <i>Juniperus saltuaria</i>                       | 9.5                | 0                  | —                            |
| <i>Juniperus semiglobosa</i>                     | 13.8               | 0                  | — ; Indomalayan              |
| <i>Juniperus squamata</i>                        | 26.8               | 0                  | — ; Indomalayan              |
| <i>Juniperus tibetica</i>                        | 14.8               | 0                  | —                            |
| <i>Keteleeria davidiana</i>                      | 15.1               | 0                  | — ; Indomalayan              |
| <i>Larix griffithii</i>                          | 13.3               | 0                  | — ; Indomalayan              |
| <i>Larix mastersiana</i>                         | 3.4                | 0                  | —                            |
| <i>Larix potaninii</i>                           | 15.7               | 0                  | —                            |
| <i>Microbiota decussata</i>                      | 1.7                | 0                  | —                            |
| <i>Picea alcoquiana</i>                          | 2.1                | 0                  | — ; Australasia              |
| <i>Picea asperata</i>                            | 11.7               | 0                  | — ; Australasia              |
| <i>Picea aurantiaca</i>                          | 1.7                | 0                  | —                            |
| <i>Picea brachytyla</i>                          | 12.0               | 0                  | —                            |
| <i>Picea crassifolia</i>                         | 13.4               | 0                  | —                            |
| <i>Picea farreri</i>                             | 2.5                | 0                  | —                            |
| <i>Picea glehnii</i>                             | 3.8                | 0                  | — ; Australasia              |
| <i>Picea jezoensis</i>                           | 5.5                | 0                  | —                            |
| <i>Picea koyamae</i>                             | 2.3                | 0                  | — ; Australasia              |
| <i>Picea likiangensis</i>                        | 13.0               | 0                  | — ; Australasia              |
| <i>Picea linzhiensis</i>                         | 6.0                | 0                  | —                            |
| <i>Picea maximowiczii</i>                        | 0.6                | 0                  | —                            |
| <i>Picea meyeri</i>                              | 6.5                | 0                  | —                            |
| <i>Picea neveitchii</i>                          | 4.3                | 0                  | —                            |
| <i>Picea omorika</i>                             | 4.3                | 0                  | — ; Australasia              |
| <i>Picea orientalis</i>                          | 10.1               | 0                  | — ; Australasia              |
| <i>Picea polita</i>                              | 2.1                | 0                  | —                            |
| <i>Picea purpurea</i>                            | 9.0                | 0                  | —                            |
| <i>Picea retroflexa</i>                          | 7.5                | 0                  | — ; Australasia              |
| <i>Picea schrenkiana</i>                         | 10.8               | 0                  | —                            |
| <i>Picea wilsonii</i>                            | 12.0               | 0                  | —                            |
| <i>Pinus brutia</i>                              | 27.4               | 0                  | — ; Australasia              |
| <i>Pinus bungeana</i>                            | 12.9               | 0                  | — ; Australasia              |
| <i>Pinus densata</i>                             | 12.2               | 0                  | — ; Australasia              |
| <i>Pinus gerardiana</i>                          | 14.7               | 0                  | — ; Indomalayan; Australasia |
| <i>Pinus heldreichii</i>                         | 10.8               | 0                  | — ; Australasia              |
| <i>Pinus henryi</i>                              | 4.6                | 0                  | —                            |

continued

| Species                         | Occur coverage (%) | Trait coverage (%) | Realm                        |
|---------------------------------|--------------------|--------------------|------------------------------|
| <i>Pinus parviflora</i>         | 5.3                | 0                  | — ; Australasia              |
| <i>Pinus peuce</i>              | 4.7                | 0                  | —                            |
| <i>Pinus squamata</i>           | 0.8                | 0                  | —                            |
| <i>Pinus uncinata</i>           | 4.2                | 0                  | —                            |
| <i>Pinus yunnanensis</i>        | 20.4               | 0                  | — ; Indomalayan; Australasia |
| <i>Podocarpus macrophyllus</i>  | 16.1               | 0                  | — ; Indomalayan; Australasia |
| <i>Podocarpus subtropicalis</i> | 1.0                | 0                  | —                            |
| <i>Pseudolarix amabilis</i>     | 4.7                | 0                  | — ; Australasia; Indomalayan |
| <i>Pseudotsuga japonica</i>     | 0.9                | 0                  | —                            |
| <i>Pseudotsuga sinensis</i>     | 13.8               | 0                  | — ; Indomalayan              |
| <i>Sciadopitys verticillata</i> | 2.9                | 0                  | —                            |
| <i>Taxus chinensis</i>          | 10.2               | 0                  | — ; Indomalayan              |
| <i>Taxus cuspidata</i>          | 4.0                | 0                  | —                            |
| <i>Taxus mairei</i>             | 11.7               | 0                  | — ; Indomalayan              |
| <i>Thuja koraiensis</i>         | 2.1                | 0                  | —                            |
| <i>Thuja standishii</i>         | 2.8                | 0                  | —                            |
| <i>Thuja sutchuenensis</i>      | 0.9                | 0                  | —                            |
| <i>Thujopsis dolabrata</i>      | 10.3               | 0                  | — ; Australasia              |
| <i>Torreya fargesii</i>         | 8.0                | 0                  | —                            |
| <i>Torreya grandis</i>          | 4.4                | 0                  | — ; Indomalayan              |
| <i>Torreya nucifera</i>         | 3.9                | 0                  | —                            |
| <i>Tsuga chinensis</i>          | 20.1               | 0                  | — ; Indomalayan              |
| <i>Tsuga diversifolia</i>       | 2.2                | 0                  | —                            |
| <i>Tsuga dumosa</i>             | 24.7               | 0                  | — ; Indomalayan              |
| <i>Tsuga forrestii</i>          | 9.1                | 0                  | —                            |
| <i>Tsuga sieboldii</i>          | 3.5                | 0                  | — ; Australasia              |
